# Supplementary material
Source: PubMed Central journal article supplement (PMC3537908)
Supplement: NIHMS421195-supplement-1.pdf [file NIHMS421195-supplement-1.pdf]

## Supplementary Materials

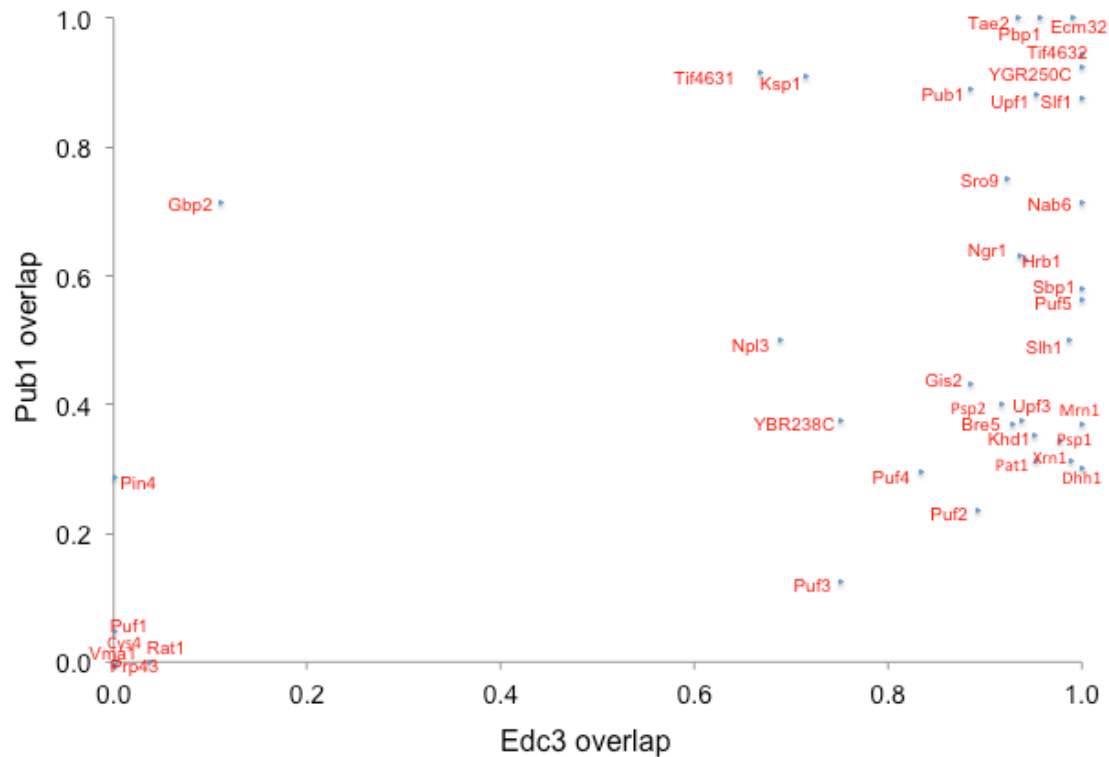

**Supplementary Figure 1** Plot of the degree of overlap between GFP foci and mCherry labeled Pub1 (y-axis) and Edc3 (x-axis) as measured by fluorescence microscopy. Proteins with fraction of overlap with Edc3 greater than 0.67 are considered to be either stress granule or P-body components. Gbp2, a known stress granule component<sup>3</sup> seems to be an outlier, however it is possible that insufficient time was given for this factor to enter granules (J.R. Buchan and R. Parker, unpublished). Components that demonstrate greater than 0.67 fractional overlap with Edc3 have been plotted on a heat map in Figure 3b to qualify their stress granule or P-body-like character.

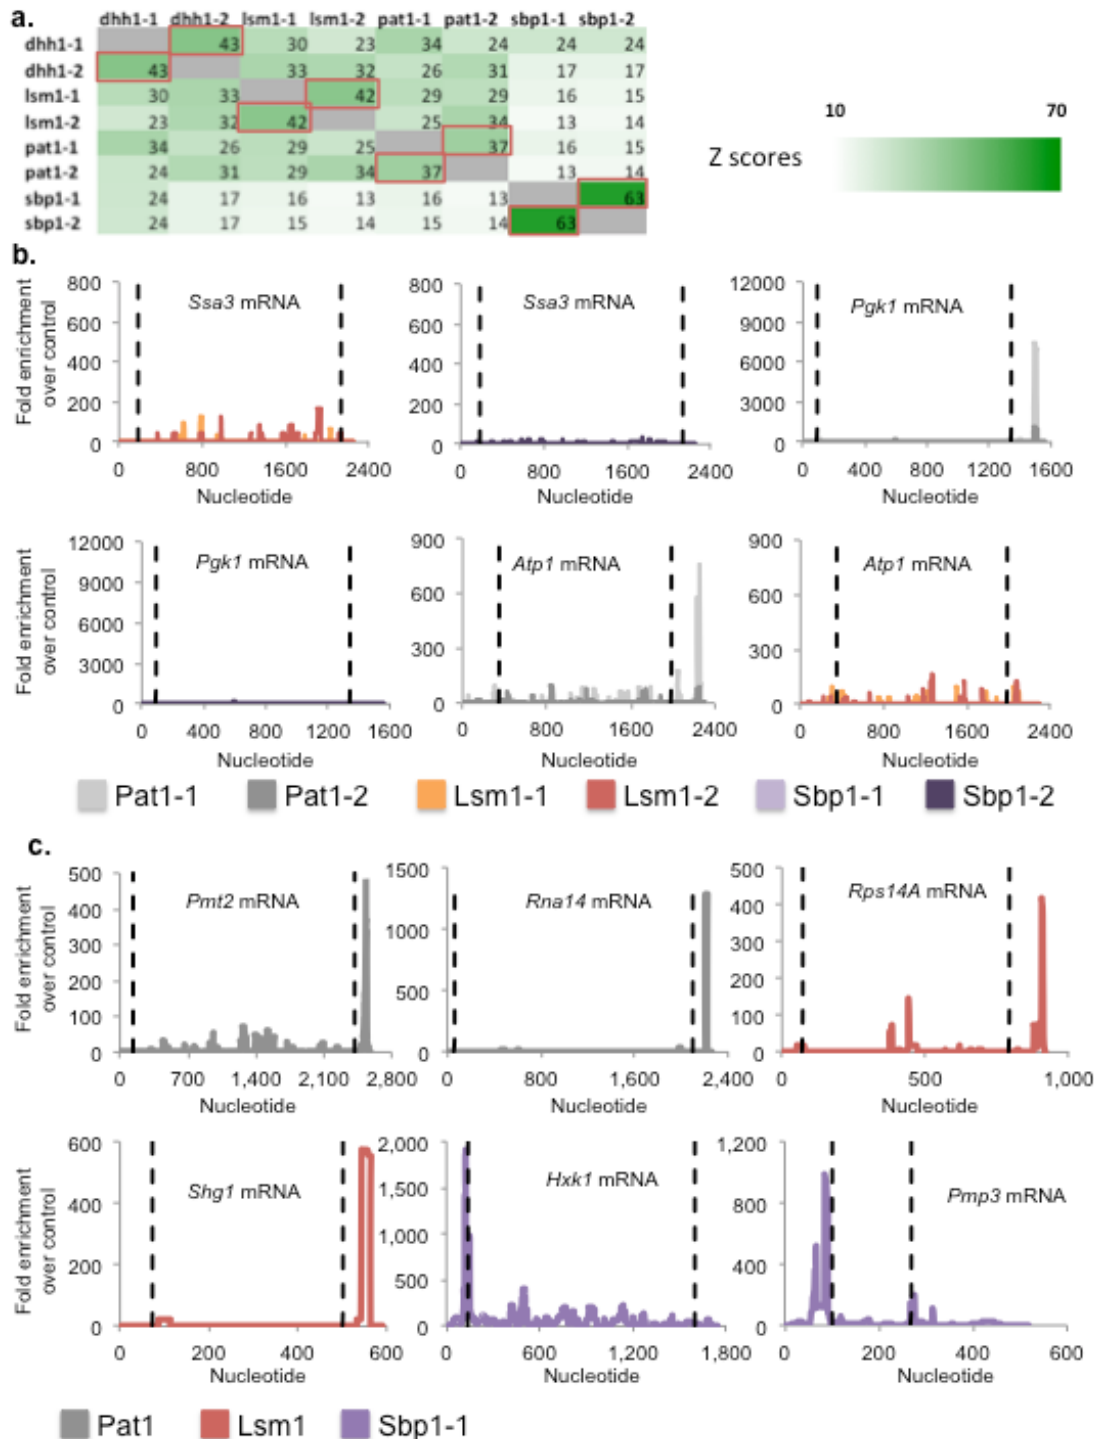

**Supplementary Figure 2** P-body proteins bind an overlapping set of mRNA with positional specificity. (a) Z-scores indicating the significance of the overlap between mRNA targets identified by CLIP for the indicated proteins. Replicates

of CLIP experiments are highlighted in red boxes. Experiments 1 and 2 are indicated by -1 and -2 respectively. Cells are colored based on Z-scores as shown in the color bar. **(b)** CLIP data for the mRNA shown in Figure 4d showing the enrichment of sequence reads for proteins not shown in the main text. Lsm1 is shown in orange, Pat1 in gray and Sbp1 in purple. Replicate traces are shown in darker shades. **(c)** Additional example mRNA are shown to demonstrate the positional localization of Pat1, Lsm1 and Sbp1. Pat1 data is shown in gray for *Pmt2* and *Rna14* mRNA, Lsm1 in red for *Shg1* and *Rps14A* mRNA, and Sbp1 is shown in purple for *Hxk1* and *Pmp3* mRNA. For both **(b)** and **(c)**, dashed black lines indicate the limits of the open reading frame.

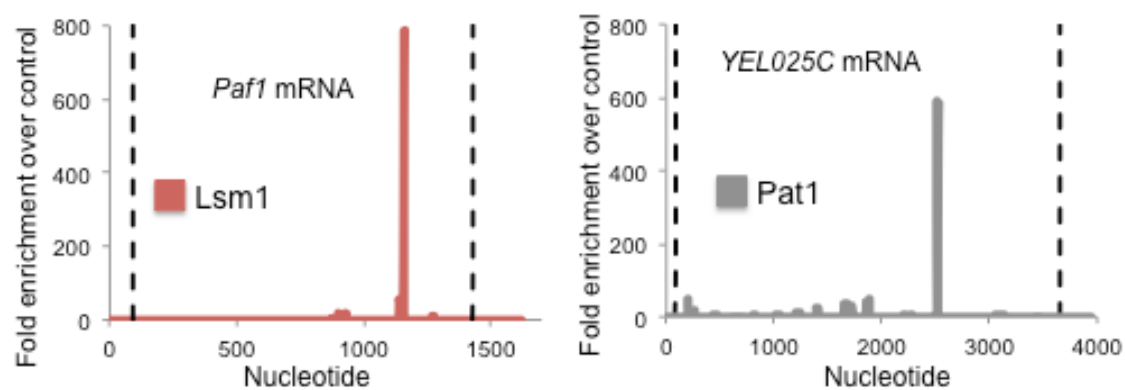

**Supplementary Figure 3** Analysis of positional specificity in P-body protein binding to mRNA. Examples of CLIP data showing Pat1 and Lsm1 binding sites outside of the 3' UTR. From left: *Paf1* mRNA demonstrates Lsm1 binding in the ORF. *YEL025C* mRNA demonstrates Pat1 binding to the ORF.

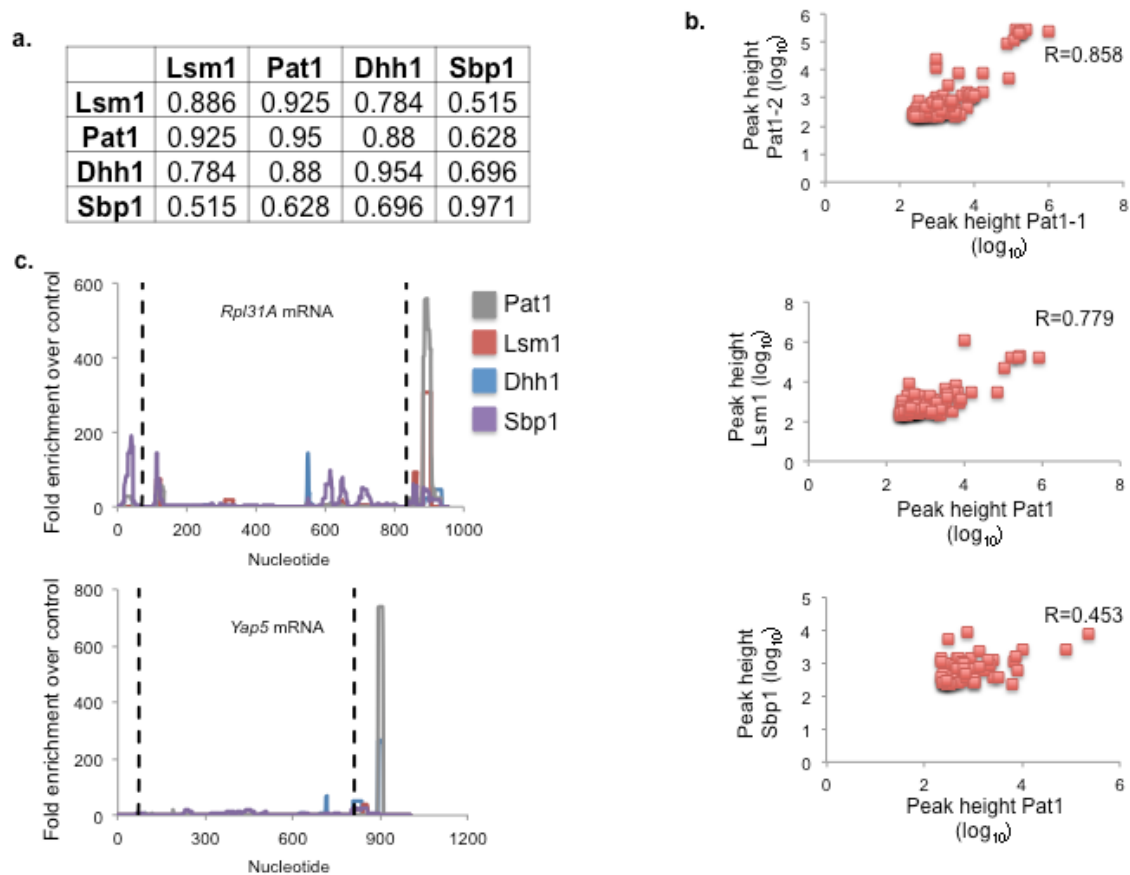

**Supplementary Figure 4** P-body proteins co-localize on mRNA. **(a)** A chart showing the Pearson correlation coefficients as calculated from peak positions of mRNA bound by both proteins (see methods). **(b)** Example plots of comparisons of sequence reads for co-localized peaks between replicate data sets (top) and between proteins. **(c)** Plots showing enrichment over the control sequence data for individual mRNAs. Dhh1 data is shown in blue, Lsm1 in red, Pat1 in green and Sbp1 in purple. Dashed black lines indicate the limits of the open reading frame.

a.

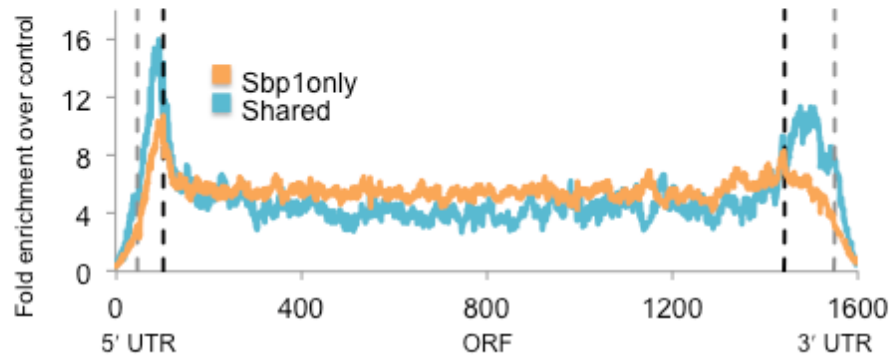

b.

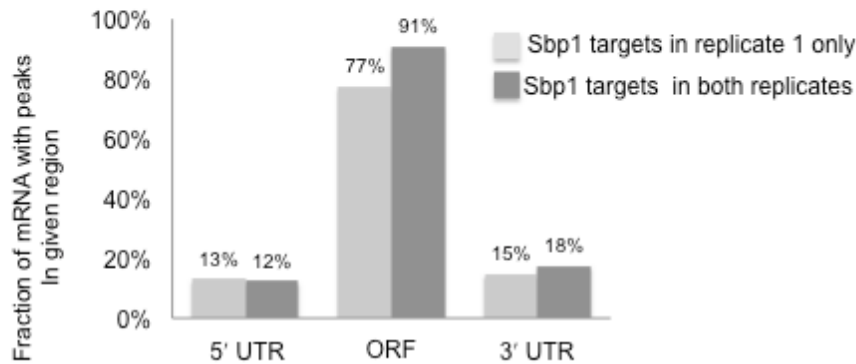

c.

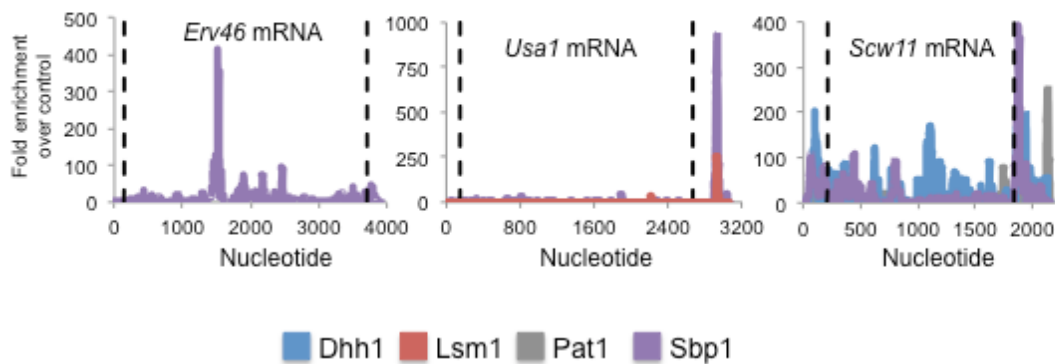

**Supplementary Figure 5** Effects of other P-body proteins on the binding sites of Sbp1. **(a)** Average plot of enrichment of CLIP sequence tags over the control sequence for Sbp1 target mRNAs are shown. Those that bind only to Sbp1 are shown in orange, those that also bind to Dhh1, Lsm1 and/or Pat1 are shown in aqua. **(b)** The effect of other proteins on Sbp1 distribution is not due to internal biases in the Sbp1 data sets: Bar graph showing the distribution of peaks across

the transcript for mRNA identified as Sbp1 targets in replicate 1 only (light gray) or in both replicates of the Sbp1 CLIP experiment (dark gray). No statistically significant difference was observed in the distribution of Sbp1 peaks in the UTRs, unpaired Student's t-test was used, n=363 mRNA for replicate 1 only and 671 mRNA for overlap between replicates. (c) Individual CLIP traces showing examples of Sbp1 peak position when bound to mRNA with and without binding sites of other P-body proteins. *Erv46* mRNA demonstrates Sbp1 binding in the ORF when binding sites for none of the other tested proteins are present. *Scw11* mRNA demonstrates Sbp1 binding in the 3' UTR in the presence of Pat1 and Dhh1 binding sites. *Usa1* mRNA demonstrates Sbp1 binding to the 3' UTR in the presence of Lsm1 binding sites.

**Supplementary Table 1:** A list of all 120 proteins identified as enriched by the in vivo capture of RBPs. Supplementary\_Table1.xlsx

**Supplementary Table 2:** mRNA binding proteins conserved in mammals<sup>1,2</sup>

| <b>Yeast Protein</b> | <b>Homologue/ Related Human Protein</b> | <b>Identified in Castello et al.</b> | <b>Identified in Baltz et al.</b> |
|----------------------|-----------------------------------------|--------------------------------------|-----------------------------------|
| Bms1                 | Bms1                                    | YES                                  | YES                               |
| Dbp1                 | DDX3X                                   | YES                                  | YES                               |
| Ded1                 | DDX3X                                   | YES                                  | YES                               |
| Dhh1                 | DDX6                                    | YES                                  | YES                               |
| Ebp2                 | EBNA1BP2                                | YES                                  | YES                               |
| Gbp2                 | HNRNPM                                  | YES                                  | YES                               |
| Gis2                 | CNBP                                    | YES                                  | YES                               |
| Mak21                | CEBPZ                                   | YES                                  | YES                               |
| Mex67                | NXF1                                    | YES                                  | YES                               |
| Mrd1                 | RBM19                                   | YES                                  | YES                               |
| Nab2                 | ZC3H14                                  | YES                                  | YES                               |
| Nam8                 | TRNAU1AP                                | YES                                  | YES                               |
| Nan1                 | WDR75                                   | YES                                  | YES                               |
| Ngr1                 | TRNAU1AP                                | YES                                  | YES                               |
| Noc2                 | NOC2L                                   | YES                                  | YES                               |
| Nop4                 | RBM28                                   | YES                                  | YES                               |
| Nop56                | NOP56                                   | YES                                  | YES                               |
| Nop58                | NOP58                                   | YES                                  | YES                               |
| Nop7                 | PES1                                    | YES                                  | YES                               |
| Nop9                 | C14orf21                                | YES                                  | YES                               |
| Npl3                 | SRSF4/SFRS4                             | YES                                  | YES                               |
| Nsr1                 | NCL                                     | YES                                  | YES                               |
| Pab1                 | PABPC1                                  | YES                                  | YES                               |
| Pap2                 | PAPD5                                   | YES                                  | YES                               |
| Pat1                 | PATL1                                   | YES                                  | YES                               |
| Prp43                | DHX16                                   | YES                                  | YES                               |
| Prp8                 | PRPF8                                   | YES                                  | YES                               |
| Pub1                 | TIA1                                    | YES                                  | YES                               |
| Puf3                 | PUM1                                    | YES                                  | YES                               |
| Puf4                 | PUM2                                    | YES                                  | YES                               |
| Puf6                 | KIAA0020                                | YES                                  | YES                               |
| Pus1                 | PUS1                                    | YES                                  | YES                               |
| Rat1                 | XRN2                                    | YES                                  | YES                               |

|         |          |     |     |
|---------|----------|-----|-----|
| Rpb2    | POLR2B   | YES | YES |
| Rps20   | RPS20    | YES | YES |
| Rrp12   | RRP12    | YES | YES |
| Scp160  | HDLBP    | YES | YES |
| Sen1    | HELZ     | YES | YES |
| Slh1    | SNRNP200 | YES | YES |
| Sof1    | DCAF13   | YES | YES |
| Spt5    | SUPT5H   | YES | YES |
| Tif3    | EIF4B    | YES | YES |
| Tif32   | EIF3A    | YES | YES |
| Tif4631 | EIF4G1   | YES | YES |
| Tif4632 | EIF4G2   | YES | YES |
| Tma46   | ZC3H15   | YES | YES |
| Ubp3    | USP10    | YES | YES |
| Upf1    | UPF1     | YES | YES |
| Urb1    | URB1     | YES | YES |
| Utp20   | UTP20    | YES | YES |
| Xrn1    | XRN1     | YES | YES |
| Ygr250c | CELF1    | YES | YES |
| Ylr419w | DHX36    | YES | YES |
| Cpr1    | PPIA     | YES | YES |
| Nip1    | EIF3C    | YES | YES |
| Pwp2    | PWP2     | YES | YES |
| Cbf5    | DKC1     | YES | NO  |
| Dbp9    | DDX56    | YES | NO  |
| Hek2    | PCBP3    | YES | NO  |
| Mlp1    | TPR      | YES | NO  |
| Mtr4    | SKIV2L2  | YES | NO  |
| Nug1    | GNL3L    | YES | NO  |
| Pbp2    | PCBP3    | YES | NO  |
| Rrp5    | PDCD11   | YES | NO  |
| Sup35   | GSPT1    | YES | NO  |
| Tys1    | YARS     | YES | NO  |
| Dus3    | DUS3L    | NO  | YES |
| Hrb1    | MYEF2    | NO  | YES |
| Hrp1    | MSI1     | NO  | YES |
| Hts1    | HARS2    | NO  | YES |
| Sto1    | NCBP1    | NO  | YES |

**Supplementary Table 3** :A list of mRNAs (Tier1 and Tier2) bound by Dhh1,

Lsm1, Pat1 and Sbp1. Supplementary\_Table3.xlsx

## **Supplementary Note**

### *Yeast Strains and Growth Conditions*

For in vivo capture of RBPs, yeast strain BY4741 was grown to 0.5–0.6 OD<sub>600</sub> in YEPD with 2% glucose at 30°C. Strains for microscopy were grown in minimal medium with the appropriate amino acids and 2% glucose to an OD<sub>600</sub> of 0.4–0.6. Yeast strains were transformed using standard chemical transformation techniques.

### *Statistical Analysis*

Two methods were applied to assess the similarity of peaks between replicate data sets and CLIP data sets for different proteins:

A) Signal strength of co-localized peaks (Fig. 4a and Supplementary Fig. 4c):

For all peaks from the two data sets that are within 30 nucleotides (the approximate length of our sequence reads), the number of sequence reads after normalization (see above) were plotted and Pearson correlation coefficients calculated from the scatter plots.

B) Proximity of peaks (Supplementary Fig. 5b): For each mRNA found in both data sets, the peak positions for each peak in data set 1 and the closest corresponding peak in data set 2 were plotted on a 2-D scatter plot as distance from transcriptional start site. Pearson correlation coefficients were calculated from the scatter plots.

## References

1. Castello, A. *et al.* Insights into RNA Biology from an Atlas of Mammalian mRNA-Binding Proteins. *Cell* **149**, 1393–1406 (2012).
2. Baltz, A. G. *et al.* The mRNA-Bound Proteome and Its Global Occupancy Profile on Protein-Coding Transcripts. *Molecular Cell* **46**, 674–690 (2012).
3. Buchan, J. R., Muhlrads, D. & Parker, R. P bodies promote stress granule assembly in *Saccharomyces cerevisiae*. *J Cell Biol* **183**, 441–455 (2008).
